# Supplementary material
Source: publisher site journal article supplement (https://www.dovepress.com/article/336952)
Supplement: Supplementary file 1 [file get_supplementary_file.php]

## Appendix 1

# COVID-19 vaccine acceptance among health professionals of Queen Elizabeth Hospital, Barbados

### A. Demographic information

#### 1. 1. Gender

*Mark only one oval.*

- Male
- Female
- Transgender
- Non-binary/non-conforming
- Prefer not to respond

#### 2. 2. Age

*Mark only one oval.*

- 18 – 24
- 25 – 34
- 35 – 44
- 45 – 54
- 55+

## 3. 3. Marital status

*Mark only one oval.*

- Married
- Single
- Widowed
- Separated

## 4. 4. Nationality

*Mark only one oval.*

- Barbados
- Jamaica
- Trinidad and Tobago
- India
- USA
- Other: \_\_\_\_\_

## 5. 5. Do you have a chronic illness (e.g. Diabetes, heart disease etc.)?

*Mark only one oval.*

- Yes
- No

## 6. 6. Occupation

*Mark only one oval.*

- Doctor
- Laboratory Technologist
- Nurse
- Pharmacist
- Physiotherapy
- Radiographer
- Lab Technician
- Other: \_\_\_\_\_

## 7. 7. In which department do you work?

*Mark only one oval.*

- ICU
- WARD
- AE
- REHAB
- Pharmacy
- Operation Theater
- Out-patient Clinic
- Other: \_\_\_\_\_

## B. Knowledge about COVID-19

Please select the answer of your choice.

8. 1. How would you rate your knowledge level on COVID-19?

*Mark only one oval.*

Very poor

Poor

Average

Good

Very good

9. 2. From where you collect the information for COVID-19? [You may check more than one option]

*Tick all that apply.*

Research articles

Government website

WHO/PAHO website

News blogs

Newspapers

Radio

Television

Social-media

The internet

Other:  \_\_\_\_\_

10. 3. Do you know in your immediate social network anyone sick with COVID-19?

*Mark only one oval.*

Yes, confirmed

Yes, but not yet confirmed

No

Don't know

C. Current Flu/other vaccines behavior

Please select the answer of your choice.

11. 1. Have you been vaccinated against the flu virus in the last year [2020]?

*Mark only one oval.*

Yes

No

12. 2. Will you get vaccinated against flu this year [2021]?

*Mark only one oval.*

Yes

No

13. 3. How important is it for you to get the flu vaccine every year?

*Mark only one oval.*

Very important

Somewhat important

Not important

14. 4. Do you have any plan to be vaccinated against other infections (Like Hepatitis Vaccine)?

*Mark only one oval.*

Yes

No

D. Acceptance of COVID-19 Vaccination

Please select the answer of your choice.

15. 1. I am confident in the scientific vetting process for a new COVID-19 vaccine.

*Mark only one oval.*

- Strongly disagree
- Disagree
- Neutral
- Agree
- Strongly agree

16. 2. COVID-19 vaccines would be 'SAFE' to use:

*Mark only one oval.*

- Not at all
- A little
- Moderately
- Totally
- Don't know

17. 3. COVID-19 vaccines would be 'EFFECTIVE':

*Mark only one oval.*

- Not at all
- A little
- Moderately
- Totally
- Don't know

## 18. 4. If a new COVID-19 vaccine becomes publicly available:

*Mark only one oval.*

- I intend to get it as soon as possible [If you choose this option, please go to Question 6]
- I intend to wait to see how it affects others before I get it
- I do not intend on getting it soon, but might sometime in the future
- I do not intend to ever get the vaccine

## 19. 5. Please explain your decision to delay or refuse a COVID-19 vaccine. [You may tick more than one option] [Skip this question if you answer first option of previous question, Q4]

*Tick all that apply.*

- I was COVID-19 positive by RT-PCR
- I am confident there will be other effective treatments soon
- I know less about the vaccine to make a decision
- I want to gain natural immunity against COVID-19
- I believe any rush to developing vaccine will jeopardise quality of that vaccine
- I believe I have to be sure about the side effects of the vaccine
- I don't know

## 20. 6. To what extent do the following factors contribute to your opinion of a COVID-19 vaccine? [You may tick more than one option]

*Tick all that apply.*

- Current political circumstances in the country
- The evolving science of SARS-CoV-2
- The relationship between coverage rates and community transmission
- The country in which a vaccine is manufactured
- The potential cost of a COVID-19 vaccine

Other:  \_\_\_\_\_

21. 7. Who should be vaccinated first?

Mark only one oval.

- Public
- Healthcare professionals
- High risk patients e.g., elderly people
- Pregnant women
- Children
- Politicians
- Other essential front-line workers (e.g., police)
- Government official
- Other: \_\_\_\_\_

E. Vaccine literacy (VL)  
interactive/critical skills

When looking for information about COVID-19 vaccines:

22.

Mark only one oval per row.

|                                                                         | Never                 | Rarely                | Sometimes             | Frequently            |
|-------------------------------------------------------------------------|-----------------------|-----------------------|-----------------------|-----------------------|
| Have you consulted more than one source of information?                 | <input type="radio"/> | <input type="radio"/> | <input type="radio"/> | <input type="radio"/> |
| Have you got the information you were looking for?                      | <input type="radio"/> | <input type="radio"/> | <input type="radio"/> | <input type="radio"/> |
| Have you had the opportunity to use the information?                    | <input type="radio"/> | <input type="radio"/> | <input type="radio"/> | <input type="radio"/> |
| Have you discussed your knowledge of vaccinations with your colleagues? | <input type="radio"/> | <input type="radio"/> | <input type="radio"/> | <input type="radio"/> |
| Have you considered the credibility of the sources?                     | <input type="radio"/> | <input type="radio"/> | <input type="radio"/> | <input type="radio"/> |
| Have you found any useful information to decide for vaccination?        | <input type="radio"/> | <input type="radio"/> | <input type="radio"/> | <input type="radio"/> |

About COVID-19 vaccines:

## F. COVID-19 vaccines perceptions and attitudes

23.

*Mark only one oval per row.*

|                                                                                      | Strongly disagree     | Disagree              | Neutral               | Agree                 | Strongly agree        |
|--------------------------------------------------------------------------------------|-----------------------|-----------------------|-----------------------|-----------------------|-----------------------|
| The vaccine producers care for my well-being                                         | <input type="radio"/> |
| The local authorities should check the efficacy of the vaccines prior implementation | <input type="radio"/> |
| COVID-19 vaccination should be compulsory, once available                            | <input type="radio"/> |
| The health authorities will succeed in vaccinating the entire population             | <input type="radio"/> |
| I will pay a fee to be vaccinated                                                    | <input type="radio"/> |
| I will recommend vaccines for others (e.g., relatives, patients etc.)                | <input type="radio"/> |

## G. Further comments

24. If you have any comments in relation to the implementation of COVID-19 vaccination programme in Barbados, please write in the following space.

---

This content is neither created nor endorsed by Google.

Google Forms
